# Supplementary material for: Autoantibodies against PIP4K2B and AKT3 Are Associated with Skin and Lung Fibrosis in Patients with Systemic Sclerosis
Source: MDPI journal article supplement (doi:10.3390/ijms24065629), 2023-03-15
Supplement: s1 [file s1]

## Supplementary Material

### SUPPLEMENTARY FIGURES AND LEGENDS

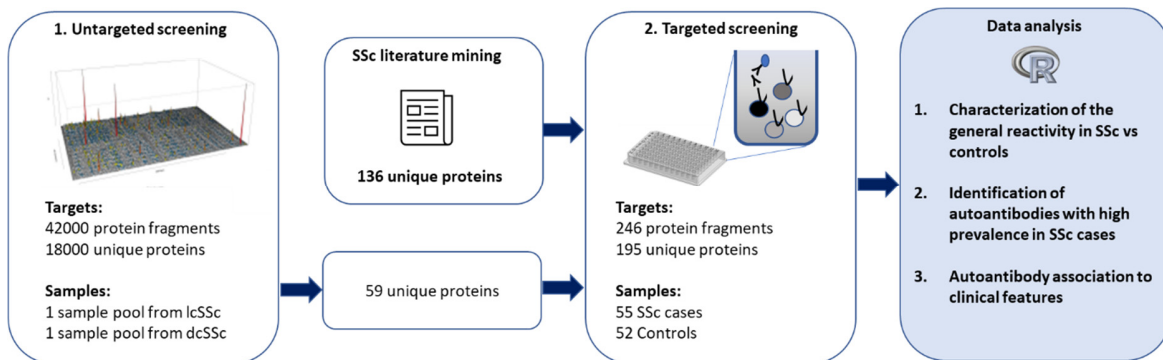

**Supplementary Figure S1. Study design.** In the first phase, we screened two plasma pools each including samples from 4 patients with localized SSc (lcSSc) or diffuse SSc (dcSSc) using a planar antigen array to identify IgG binding to protein fragments representing 18,000 human proteins. Next, a targeted screening was designed where a bead array was generated with protein fragments representing the protein selection from the planar array analysis plus a selection from literature and tested on a cohort of plasma samples including 55 SSc patients and 52 controls. The generated data were analyzed using the R studio statistical environment. The data analysis focused on identifying autoantibodies highly prevalent in SSc that could be associated with clinical features, especially fibrosis.

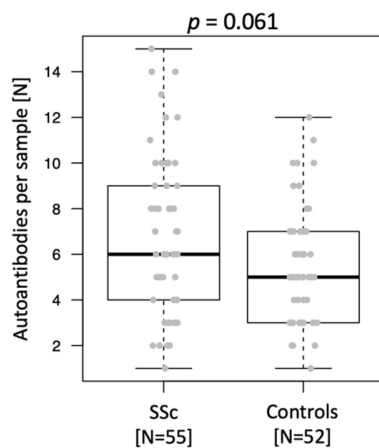

**Supplementary Figure S2. Autoantibody load in plasma of SSc patients and controls.** The plasma IgG reactivity towards 246 protein fragments was determined using an antigen bead array. The data showed a higher, even though not significant (Fisher's exact test), autoantibody load in SSc patients compared to controls.

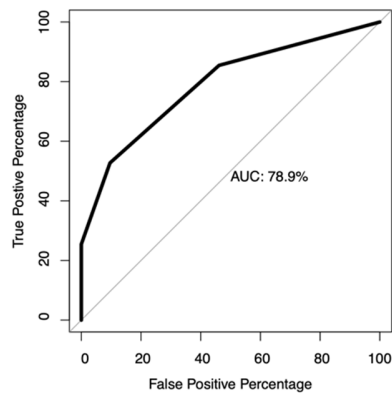

**Supplementary Figure S3. ROC curve analysis of the 11-autoantibody panel.** The curve shows the performance of the 11-autoantibody panel in separating SSc cases from controls in the tested cohort. The curve represents the True Positive and False Positive rates resulting from setting cutoffs of  $\geq 1$ -3 autoantibodies per sample to classify SSc patients and controls.

## SUPPLEMENTARY TABLES

**Supplementary Table S1. Sample pools from patients with dcSSc and lcSSc: clinical characteristics and clinical autoantibody status.**

| Pools                                 | dcSSc            | lcSSc            |
|---------------------------------------|------------------|------------------|
| Number, N                             | 4                | 4                |
| Female/ male, N (%)                   | 2 (50%)/ 2 (50%) | 2 (50%)/ 2 (50%) |
| Age, median (range)                   | 50 (41-65)       | 57 (41-65)       |
| Disease duration, Y, median (range)   | 2.5 (1-15)       | 5.5 (2-16)       |
| mRSScore, median (range)              | 32 (17-46)       | 5 (2-12)         |
| Autoantibodies, N                     |                  |                  |
| Anti-Scl70                            | 3                | 1                |
| Anti-centromere                       | 1                | 3                |
| Anti-SSA/Ro                           | 1                | 0                |
| Anti-Rnp/Sm                           | 0                | 0                |
| Negative to anti-Scl70 and centromere | 1                | 0                |
| Clinical manifestations, N            |                  |                  |
| Calcinosis cutis                      | 0                | 2                |
| Digital ulcers                        | 1                | 2                |
| Dysphagia                             | 2                | 2                |
| Lung fibrosis                         | 2                | 0                |
| PAH                                   | 2                | 0                |
| Raynaud                               | 3                | 4                |
| Reflux                                | 2                | 3                |
| Sicca                                 | 0                | 1                |

**Supplementary Table S2. Antigens included in the targeted screening.**

|   | Antigen code | Gene | Uniprot ID | Gene description       | Selection            | Ensembl Gene ID |
|---|--------------|------|------------|------------------------|----------------------|-----------------|
| 1 | HPRR3140513  | A1BG | P04217     | alpha-1-B glycoprotein | Untargeted screening | ENSG00000121410 |

## Supplementary Material

|    |             |              |        |                                                                    |                         |                 |
|----|-------------|--------------|--------|--------------------------------------------------------------------|-------------------------|-----------------|
| 2  | HPRR3140512 | A1BG         | P04217 | alpha-1-B<br>glycoprotein                                          | Untargeted<br>screening | ENSG00000121410 |
| 3  | HPRR2750140 | ABL1         | P00519 | ABL proto-oncogene 1, non-receptor tyrosine kinase                 | Literature              | ENSG00000097007 |
| 4  | HPRR3051133 | ACCSL        | Q4AC99 | 1-aminocyclopropane-1-carboxylate synthase homolog (inactive) like | Untargeted<br>screening | ENSG00000205126 |
| 5  | HPRR2551494 | ACP6         | Q9NPH0 | acid phosphatase 6, lysophosphatidic                               | Literature              | ENSG00000162836 |
| 6  | HPRR2640138 | ADAM12       | O43184 | ADAM metalloproteinase domain 12                                   | Literature              | ENSG00000148848 |
| 7  | HPRR2640136 | ADAM12       | O43184 | ADAM metalloproteinase domain 12                                   | Literature              | ENSG00000148848 |
| 8  | HPRR3790319 | ADSS1/ADSSL1 | Q8N142 | adenylosuccinate synthase 1                                        | Untargeted<br>screening | ENSG00000185100 |
| 9  | HPRR370232  | AGTR1        | P30556 | angiotensin II receptor type 1                                     | Literature              | ENSG00000144891 |
| 10 | HPRR141612  | AKT1         | P31749 | AKT serine/threonine kinase 1                                      | Literature              | ENSG00000142208 |
| 11 | HPRR3520031 | AKT2         | P31751 | AKT serine/threonine kinase 2                                      | Literature              | ENSG00000105221 |
| 12 | HPRR2690020 | AKT3         | Q9Y243 | AKT serine/threonine kinase 3                                      | Literature              | ENSG00000117020 |

|    |             |                |        |                                                |                      |                 |
|----|-------------|----------------|--------|------------------------------------------------|----------------------|-----------------|
| 13 | HPRR3070036 | ANO2           | Q9NQ90 | anoctamin 2                                    | Untargeted screening | ENSG00000047617 |
| 14 | HPRR3070037 | ANO2           | Q9NQ90 | anoctamin 2                                    | Untargeted screening | ENSG00000047617 |
| 15 | HPRR3300295 | ASIP           | P42127 | agouti signaling protein                       | Literature           | ENSG00000101440 |
| 16 | HPRR4000319 | AXIN2          | Q9Y2T1 | axin 2                                         | Literature           | ENSG00000168646 |
| 17 | HPRR2470463 | CACNA1B        | Q00975 | calcium voltage-gated channel subunit alpha1 B | Untargeted screening | ENSG00000148408 |
| 18 | HPRR3410011 | CACNA1S        | Q13698 | calcium voltage-gated channel subunit alpha1 S | Untargeted screening | ENSG00000081248 |
| 19 | HPRR3790673 | CASTOR2/GASTL2 | A6NHX0 | cytosolic arginine sensor for mTORC1 subunit 2 | Untargeted screening | ENSG00000274070 |
| 20 | HPRR3790301 | CCDC137        | Q6PK04 | coiled-coil domain containing 137              | Untargeted screening | ENSG00000185298 |
| 21 | HPRR3690018 | CCL18          | P55774 | C-C motif chemokine ligand 18                  | Literature           | ENSG00000275385 |
| 22 | HPRR3500294 | CCL7           | P80098 | C-C motif chemokine ligand 7                   | Literature           | ENSG00000108688 |
| 23 | HPRR3420436 | CD163          | Q86VB7 | CD163 molecule                                 | Literature           | ENSG00000177575 |
| 24 | HPRR2990191 | CD34           | P28906 | CD34 molecule                                  | Literature           | ENSG00000174059 |
| 25 | HPRR2990193 | CD34           | P28906 | CD34 molecule                                  | Literature           | ENSG00000174059 |

## Supplementary Material

|           |             |         |        |                                     |            |                 |
|-----------|-------------|---------|--------|-------------------------------------|------------|-----------------|
| <b>26</b> | HPRR2990083 | CD80    | P33681 | CD80 molecule                       | Literature | ENSG00000121594 |
| <b>27</b> | HPRR1450199 | CD86    | P42081 | CD86 molecule                       | Literature | ENSG00000114013 |
| <b>28</b> | HPRR4240093 | CDH5    | P33151 | cadherin 5                          | Literature | ENSG00000179776 |
| <b>29</b> | HPRR3890121 | CENPA   | P49450 | centromere protein A                | Literature | ENSG00000115163 |
| <b>30</b> | HPRR3310037 | CENPB   | P07199 | centromere protein B                | Literature | ENSG00000125817 |
| <b>31</b> | HPRR2090090 | CHRM3   | P20309 | cholinergic receptor muscarinic 3   | Literature | ENSG00000133019 |
| <b>32</b> | HPRR1160007 | CNR1    | P21554 | cannabinoid receptor 1              | Literature | ENSG00000118432 |
| <b>33</b> | HPRR1160013 | CNR2    | P34972 | cannabinoid receptor 2              | Literature | ENSG00000188822 |
| <b>34</b> | HPRR2890225 | COL18A1 | P39060 | collagen type XVIII alpha 1 chain   | Literature | ENSG00000182871 |
| <b>35</b> | HPRR2890226 | COL18A1 | P39060 | collagen type XVIII alpha 1 chain   | Literature | ENSG00000182871 |
| <b>36</b> | HPRR1770038 | COL1A1  | P02452 | collagen type I alpha 1 chain       | Literature | ENSG00000108821 |
| <b>37</b> | HPRR4030210 | COL1A2  | P08123 | collagen type I alpha 2 chain       | Literature | ENSG00000164692 |
| <b>38</b> | HPRR4030209 | COL1A2  | P08123 | collagen type I alpha 2 chain       | Literature | ENSG00000164692 |
| <b>39</b> | HPRR1770057 | COL5A1  | P20908 | collagen type V alpha 1 chain       | Literature | ENSG00000130635 |
| <b>40</b> | HPRR3250149 | COMP    | P49747 | cartilage oligomeric matrix protein | Literature | ENSG00000105664 |

|    |             |           |        |                                                                            |                      |                 |
|----|-------------|-----------|--------|----------------------------------------------------------------------------|----------------------|-----------------|
| 41 | HPRR3860038 | CREBBP    | Q92793 | CREB binding protein                                                       | Literature           | ENSG00000005339 |
| 42 | HPRR3970260 | CSF2      | P04141 | colony stimulating factor 2                                                | Literature           | ENSG00000164400 |
| 43 | HPRR2760285 | CSF2      | P04141 | colony stimulating factor 2                                                | Literature           | ENSG00000164400 |
| 44 | HPRR2590050 | CCN2/CTGF | P29279 | Cellular Communication Network Factor 2 or Connective Tissue Growth Factor | Literature           | ENSG00000118523 |
| 45 | HPRR2590049 | CCN2/CTGF | P29279 | Cellular Communication Network Factor 2 or Connective Tissue Growth Factor | Literature           | ENSG00000118523 |
| 46 | HPRR2760300 | CTNNB1    | P35222 | catenin beta 1                                                             | Literature           | ENSG00000168036 |
| 47 | HPRR2700195 | CXCL8     | P10145 | C-X-C motif chemokine ligand 8                                             | Literature           | ENSG00000169429 |
| 48 | HPRR3720504 | DIDO1     | Q9BTC0 | death inducer-obliterator 1                                                | Untargeted screening | ENSG00000101191 |
| 49 | HPRR3880140 | DKK1      | O94907 | dickkopf WNT signaling pathway inhibitor 1                                 | Literature           | ENSG00000107984 |
| 50 | HPRR2570091 | EDN1      | P05305 | endothelin 1                                                               | Literature           | ENSG00000078401 |
| 51 | HPRR2570089 | EDN1      | P05305 | endothelin 1                                                               | Literature           | ENSG00000078401 |
| 52 | HPRR2090126 | EDNRA     | P25101 | endothelin receptor type A                                                 | Literature           | ENSG00000151617 |
| 53 | HPRR2090127 | EDNRA     | P25101 | endothelin receptor type A                                                 | Literature           | ENSG00000151617 |

## Supplementary Material

|           |             |       |        |                                                  |                      |                 |
|-----------|-------------|-------|--------|--------------------------------------------------|----------------------|-----------------|
| <b>54</b> | HPRR2760156 | EGR1  | P18146 | early growth response 1                          | Literature           | ENSG00000120738 |
| <b>55</b> | HPRR4120223 | EID2  | Q8N6I1 | EP300 interacting inhibitor of differentiation 2 | Untargeted screening | ENSG00000176396 |
| <b>56</b> | HPRR3280312 | EID2  | Q8N6I1 | EP300 interacting inhibitor of differentiation 2 | Untargeted screening | ENSG00000176396 |
| <b>57</b> | HPRR1950396 | ENG   | P17813 | endoglin                                         | Literature           | ENSG00000106991 |
| <b>58</b> | HPRR4170053 | ENG   | P17813 | endoglin                                         | Literature           | ENSG00000106991 |
| <b>59</b> | HPRR221232  | EP300 | Q09472 | E1A binding protein p300                         | Literature           | ENSG00000100393 |
| <b>60</b> | HPRR4180964 | ETS1  | P14921 | ETS proto-oncogene 1, transcription factor       | Literature           | ENSG00000134954 |
| <b>61</b> | HPRR2050366 | FBN1  | P35555 | fibrillin 1                                      | Literature           | ENSG00000166147 |
| <b>62</b> | HPRR2050365 | FBN1  | P35555 | fibrillin 1                                      | Literature           | ENSG00000166147 |
| <b>63</b> | HPRR3060143 | FBXW8 | Q8N3Y1 | F-box and WD repeat domain containing 8          | Untargeted screening | ENSG00000174989 |
| <b>64</b> | HPRR3830253 | FGF2  | P09038 | fibroblast growth factor 2                       | Literature           | ENSG00000138685 |
| <b>65</b> | HPRR4290340 | FGF2  | P09038 | fibroblast growth factor 2                       | Literature           | ENSG00000138685 |
| <b>66</b> | HPRR3870004 | FGFR1 | P11362 | fibroblast growth factor receptor 1              | Literature           | ENSG00000077782 |
| <b>67</b> | HPRR3760448 | FLI1  | Q01543 | Fli-1 proto-oncogene, ETS transcription factor   | Literature           | ENSG00000151702 |



|    |             |        |        |                                                         |                      |                 |
|----|-------------|--------|--------|---------------------------------------------------------|----------------------|-----------------|
| 68 | HPRR2050095 | FN1    | P02751 | fibronectin 1                                           | Literature           | ENSG00000115414 |
| 69 | HPRR2090190 | FSHR   | P23945 | follicle stimulating hormone receptor                   | Untargeted screening | ENSG00000170820 |
| 70 | HPRR4220457 | FSHR   | P23945 | follicle stimulating hormone receptor                   | Untargeted screening | ENSG00000170820 |
| 71 | HPRR1950254 | FXD5   | Q96DB9 | FXD domain containing ion transport regulator 5         | Untargeted screening | ENSG00000089327 |
| 72 | HPRR2810079 | GABRE  | P78334 | gamma-aminobutyric acid type A receptor subunit epsilon | Untargeted screening | ENSG00000102287 |
| 73 | HPRR3140486 | GLE1   | Q53GS7 | GLE1 RNA export mediator                                | Untargeted screening | ENSG00000119392 |
| 74 | HPRR3470107 | GRXCR2 | A6NFK2 | glutaredoxin and cysteine rich domain containing 2      | Untargeted screening | ENSG00000204928 |
| 75 | HPRR3300109 | GSS    | P48637 | glutathione synthetase                                  | Untargeted screening | ENSG00000100983 |
| 76 | HPRR2780009 | HDAC1  | Q13547 | histone deacetylase 1                                   | Literature           | ENSG00000116478 |
| 77 | HPRR2370166 | HELZ   | P42694 | helicase with zinc finger                               | Untargeted screening | ENSG00000198265 |
| 78 | HPRR3140054 | HSPA5  | P11021 | heat shock protein family A (Hsp70) member 5            | Untargeted screening | ENSG00000044574 |
| 79 | HPRR1220005 | HTR5A  | P47898 | 5-hydroxytryptamine receptor 5A                         | Literature           | ENSG00000157219 |

## Supplementary Material

|           |             |         |        |                                                     |                      |                 |
|-----------|-------------|---------|--------|-----------------------------------------------------|----------------------|-----------------|
| <b>80</b> | HPRR4160047 | ICA1    | Q05084 | islet cell autoantigen 1                            | Untargeted screening | ENSG00000003147 |
| <b>81</b> | HPRR1510003 | ICA1    | Q05084 | islet cell autoantigen 1                            | Untargeted screening | ENSG00000003147 |
| <b>82</b> | HPRR330202  | ICAM1   | P05362 | intercellular adhesion molecule 1                   | Literature           | ENSG00000090339 |
| <b>83</b> | HPRR330201  | ICAM1   | P05362 | intercellular adhesion molecule 1                   | Literature           | ENSG00000090339 |
| <b>84</b> | HPRR370176  | IFI16   | Q16666 | interferon gamma inducible protein 16               | Literature           | ENSG00000163565 |
| <b>85</b> | HPRR4190871 | IFI16   | Q16666 | interferon gamma inducible protein 16               | Literature           | ENSG00000163565 |
| <b>86</b> | HPRR2760324 | IFNB1   | P01574 | interferon beta 1                                   | Literature           | ENSG00000171855 |
| <b>87</b> | HPRR2960107 | IGF2BP2 | Q9Y6M1 | insulin like growth factor 2 mRNA binding protein 2 | Untargeted screening | ENSG00000073792 |
| <b>88</b> | HPRR2760042 | IL11    | P20809 | interleukin 11                                      | Literature           | ENSG00000095752 |
| <b>89</b> | HPRR330015  | IL13    | P35225 | interleukin 13                                      | Literature           | ENSG00000169194 |
| <b>90</b> | HPRR2760112 | IL17A   | Q16552 | interleukin 17A                                     | Literature           | ENSG00000112115 |
| <b>91</b> | HPRR4180350 | IL1A    | P01583 | interleukin 1 alpha                                 | Literature           | ENSG00000115008 |
| <b>92</b> | HPRR330003  | IL1B    | P01584 | interleukin 1 beta                                  | Literature           | ENSG00000125538 |
| <b>93</b> | HPRR4370105 | IL1B    | P01584 | interleukin 1 beta                                  | Literature           | ENSG00000125538 |

|            |             |       |        |                                 |            |                 |
|------------|-------------|-------|--------|---------------------------------|------------|-----------------|
| <b>94</b>  | HPRR3071105 | IL31  | Q6EBC2 | interleukin 31                  | Literature | ENSG00000204671 |
| <b>95</b>  | HPRR3920122 | IL4   | P05112 | interleukin 4                   | Literature | ENSG00000113520 |
| <b>96</b>  | HPRR330007  | IL6   | P05231 | interleukin 6                   | Literature | ENSG00000136244 |
| <b>97</b>  | HPRR2760215 | IL6   | P05231 | interleukin 6                   | Literature | ENSG00000136244 |
| <b>98</b>  | HPRR4180952 | IL6ST | P40189 | interleukin 6 signal transducer | Literature | ENSG00000134352 |
| <b>99</b>  | HPRR550014  | ILK   | Q13418 | integrin linked kinase          | Literature | ENSG00000166333 |
| <b>100</b> | HPRR3130024 | ILK   | Q13418 | integrin linked kinase          | Literature | ENSG00000166333 |
| <b>101</b> | HPRR610018  | IRF3  | Q14653 | interferon regulatory factor 3  | Literature | ENSG00000126456 |
| <b>102</b> | HPRR4340115 | IRF5  | Q13568 | interferon regulatory factor 5  | Literature | ENSG00000128604 |
| <b>103</b> | HPRR2700232 | ITGA1 | P56199 | integrin subunit alpha 1        | Literature | ENSG00000213949 |
| <b>104</b> | HPRR550012  | ITGA5 | P08648 | integrin subunit alpha 5        | Literature | ENSG00000161638 |
| <b>105</b> | HPRR3760412 | ITGB1 | P05556 | integrin subunit beta 1         | Literature | ENSG00000150093 |
| <b>106</b> | HPRR3760413 | ITGB1 | P05556 | integrin subunit beta 1         | Literature | ENSG00000150093 |
| <b>107</b> | HPRR1310041 | ITGB6 | P18564 | integrin subunit beta 6         | Literature | ENSG00000115221 |
| <b>108</b> | HPRR2970027 | JAK2  | O60674 | Janus kinase 2                  | Literature | ENSG00000096968 |

## Supplementary Material

|            |             |         |        |                                                      |                      |                 |
|------------|-------------|---------|--------|------------------------------------------------------|----------------------|-----------------|
| <b>109</b> | HPRR2970026 | JAK2    | O60674 | Janus kinase 2                                       | Literature           | ENSG00000096968 |
| <b>110</b> | HPRR3460601 | JAKMIP2 | Q96AA8 | janus kinase and microtubule interacting protein 2   | Untargeted screening | ENSG00000176049 |
| <b>111</b> | HPRR4030465 | KCNB2   | Q92953 | potassium voltage-gated channel subfamily B member 2 | Untargeted screening | ENSG00000182674 |
| <b>112</b> | HPRR2960533 | KIF15   | Q9NS87 | kinesin family member 15                             | Untargeted screening | ENSG00000163808 |
| <b>113</b> | HPRR2960534 | KIF15   | Q9NS87 | kinesin family member 15                             | Untargeted screening | ENSG00000163808 |
| <b>114</b> | HPRR2740008 | KIF4A/B | O95239 | kinesin family member 4A/B                           | Literature           | ENSG00000090889 |
| <b>115</b> | HPRR1950865 | KL      | Q9UEF7 | klotho                                               | Untargeted screening | ENSG00000133116 |
| <b>116</b> | HPRR4180849 | KL      | Q9UEF7 | klotho                                               | Untargeted screening | ENSG00000133116 |
| <b>117</b> | HPRR680113  | KLF1    | Q13351 | Kruppel like factor 1                                | Untargeted screening | ENSG00000105610 |
| <b>118</b> | HPRR3720637 | KLF1    | Q13351 | Kruppel like factor 1                                | Untargeted screening | ENSG00000105610 |
| <b>119</b> | HPRR3920097 | KLF2    | Q9Y5W3 | Kruppel like factor 2                                | Untargeted screening | ENSG00000127528 |
| <b>120</b> | HPRR3920099 | KLF2    | Q9Y5W3 | Kruppel like factor 2                                | Untargeted screening | ENSG00000127528 |

|     |             |        |        |                                           |                      |                 |
|-----|-------------|--------|--------|-------------------------------------------|----------------------|-----------------|
| 121 | HPRR4180438 | KMT2A  | Q03164 | lysine methyltransferase 2A               | Untargeted screening | ENSG00000118058 |
| 122 | HPRR2501239 | KRBA2  | Q6ZNG9 | KRAB-A domain containing 2                | Untargeted screening | ENSG00000184619 |
| 123 | HPRR2980021 | LATS1  | O95835 | large tumor suppressor kinase 1           | Untargeted screening | ENSG00000131023 |
| 124 | HPRR360140  | LEF1   | Q9UJU2 | lymphoid enhancer binding factor 1        | Literature           | ENSG00000138795 |
| 125 | HPRR3010255 | LOX    | P28300 | lysyl oxidase                             | Literature           | ENSG00000113083 |
| 126 | HPRR3010254 | LOX    | P28300 | lysyl oxidase                             | Literature           | ENSG00000113083 |
| 127 | HPRR1410088 | LPAR1  | Q92633 | lysophosphatidic acid receptor 1          | Literature           | ENSG00000198121 |
| 128 | HPRR4280266 | LPAR1  | Q92633 | lysophosphatidic acid receptor 1          | Literature           | ENSG00000198121 |
| 129 | HPRR650100  | LRP1   | Q07954 | LDL receptor related protein 1            | Literature           | ENSG00000123384 |
| 130 | HPRR4290189 | LYPLA1 | O75608 | lysophospholipase 1                       | Untargeted screening | ENSG00000120992 |
| 131 | HPRR2690048 | MAP2K1 | Q02750 | mitogen-activated protein kinase kinase 1 | Literature           | ENSG00000169032 |
| 132 | HPRR3770077 | MAPK14 | Q16539 | mitogen-activated protein kinase 14       | Literature           | ENSG00000112062 |
| 133 | HPRR3880317 | MAPK14 | Q16539 | mitogen-activated protein kinase 14       | Literature           | ENSG00000112062 |
| 134 | HPRR2760026 | MCM2   | P49736 | minichromosome maintenance                | Untargeted screening | ENSG00000073111 |

# Supplementary Material

|     |             |            |        | complex<br>component 2                   |                      |                 |
|-----|-------------|------------|--------|------------------------------------------|----------------------|-----------------|
| 135 | HPRR3830164 | MED1       | Q15648 | mediator complex subunit 1               | Untargeted screening | ENSG00000125686 |
| 136 | HPRR3120181 | MEX3C      | Q5U5Q3 | mex-3 RNA binding family member C        | Untargeted screening | ENSG00000176624 |
| 137 | HPRR221459  | MRTFA/MKL1 | Q969V6 | myocardin related transcription factor A | Literature           | ENSG00000196588 |
| 138 | HPRR1450602 | MRTFB/MKL2 | Q9ULH7 | myocardin related transcription factor B | Literature           | ENSG00000186260 |
| 139 | HPRR1320028 | MMP1       | P03956 | matrix metalloproteinase 1               | Literature           | ENSG00000196611 |
| 140 | HPRR3770068 | MMP1       | P03956 | matrix metalloproteinase 1               | Literature           | ENSG00000196611 |
| 141 | HPRR3140420 | MMP12      | P39900 | matrix metalloproteinase 12              | Literature           | ENSG00000262406 |
| 142 | HPRR3140418 | MMP12      | P39900 | matrix metalloproteinase 12              | Literature           | ENSG00000262406 |
| 143 | HPRR1320019 | MMP3       | P08254 | matrix metalloproteinase 3               | Literature           | ENSG00000149968 |
| 144 | HPRR3440044 | MMP3       | P08254 | matrix metalloproteinase 3               | Literature           | ENSG00000149968 |
| 145 | HPRR3760072 | MMP7       | P09237 | matrix metalloproteinase 7               | Literature           | ENSG00000137673 |
| 146 | HPRR4110413 | MMP7       | P09237 | matrix metalloproteinase 7               | Literature           | ENSG00000137673 |
| 147 | HPRR330062  | MMP9       | P14780 | matrix metalloproteinase 9               | Literature           | ENSG00000100985 |

|     |             |         |        |                                                 |                      |                 |
|-----|-------------|---------|--------|-------------------------------------------------|----------------------|-----------------|
| 148 | HPRR4160805 | MMP9    | P14780 | matrix metalloproteinase 9                      | Literature           | ENSG00000100985 |
| 149 | HPRR2150148 | MS4A1   | P11836 | membrane spanning 4-domains A1                  | Literature           | ENSG00000156738 |
| 150 | HPRR1420191 | MUC1    | P15941 | mucin 1, cell surface associated                | Literature           | ENSG00000185499 |
| 151 | HPRR2460052 | MYD88   | Q99836 | MYD88 innate immune signal transduction adaptor | Literature           | ENSG00000172936 |
| 152 | HPRR4030408 | NDUFA11 | Q86Y39 | NADH:ubiquinone oxidoreductase subunit A11      | Literature           | ENSG00000174886 |
| 153 | HPRR4220008 | NFAT5   | O94916 | nuclear factor of activated T cells 5           | Untargeted screening | ENSG00000102908 |
| 154 | HPRR3070953 | NOC4L   | Q9BVI4 | nucleolar complex associated 4 homolog          | Untargeted screening | ENSG00000184967 |
| 155 | HPRR2440552 | NOM1    | Q5C9Z4 | nucleolar protein with MIF4G domain 1           | Untargeted screening | ENSG00000146909 |
| 156 | HPRR4290379 | NOTCH1  | P46531 | notch receptor 1                                | Literature           | ENSG00000148400 |
| 157 | HPRR260118  | NOTCH2  | Q04721 | notch receptor 2                                | Literature           | ENSG00000134250 |
| 158 | HPRR260117  | NOTCH2  | Q04721 | notch receptor 2                                | Literature           | ENSG00000134250 |
| 159 | HPRR2170028 | NOX4    | Q9NPH5 | NADPH oxidase 4                                 | Literature           | ENSG00000086991 |
| 160 | HPRR2170027 | NOX4    | Q9NPH5 | NADPH oxidase 4                                 | Literature           | ENSG00000086991 |

## Supplementary Material

|            |             |        |        |                                               |                      |                 |
|------------|-------------|--------|--------|-----------------------------------------------|----------------------|-----------------|
| <b>161</b> | HPRR3730343 | NR4A1  | P22736 | nuclear receptor subfamily 4 group A member 1 | Literature           | ENSG00000123358 |
| <b>162</b> | HPRR3730197 | NT5C1A | Q9BXI3 | 5'-nucleotidase, cytosolic 1A                 | Literature           | ENSG00000116981 |
| <b>163</b> | HPRR3730198 | NT5C1A | Q9BXI3 | 5'-nucleotidase, cytosolic 1A                 | Literature           | ENSG00000116981 |
| <b>164</b> | HPRR221161  | OSM    | P13725 | oncostatin M                                  | Literature           | ENSG00000099985 |
| <b>165</b> | HPRR3190230 | PAGR1  | Q9BTK6 | PAXIP1 associated glutamate rich protein 1    | Untargeted screening | ENSG00000280789 |
| <b>166</b> | HPRR670206  | PDE5A  | O76074 | phosphodiesterase 5A                          | Literature           | ENSG00000138735 |
| <b>167</b> | HPRR670205  | PDE5A  | O76074 | phosphodiesterase 5A                          | Literature           | ENSG00000138735 |
| <b>168</b> | HPRR3160287 | PDF    | Q9HBH1 | peptide deformylase, mitochondrial            | Untargeted screening | ENSG00000258429 |
| <b>169</b> | HPRR670190  | PDGFRA | P16234 | platelet derived growth factor receptor alpha | Literature           | ENSG00000134853 |
| <b>170</b> | HPRR2750035 | PDGFRB | P09619 | platelet derived growth factor receptor beta  | Literature           | ENSG00000113721 |
| <b>171</b> | HPRR3030043 | PDPK1  | O15530 | 3-phosphoinositide dependent protein kinase 1 | Literature           | ENSG00000140992 |
| <b>172</b> | HPRR1470131 | PHC1   | P78364 | polyhomeotic homolog 1                        | Untargeted screening | ENSG00000111752 |
| <b>173</b> | HPRR1810044 | PHYHD1 | Q5SRE7 | phytanoyl-CoA dioxygenase                     | Untargeted screening | ENSG00000175287 |



|     |             |         |        |                                                       |                      |                 |
|-----|-------------|---------|--------|-------------------------------------------------------|----------------------|-----------------|
|     |             |         |        | domain containing<br>1                                |                      |                 |
| 174 | HPRR4190558 | PIK3R1  | P27986 | phosphoinositide-3-kinase regulatory subunit 1        | Literature           | ENSG00000145675 |
| 175 | HPRR3930144 | PIP4K2B | P78356 | phosphatidylinositol-5-phosphate 4-kinase type 2 beta | Untargeted screening | ENSG00000276293 |
| 176 | HPRR3020346 | POLR3A  | O14802 | RNA polymerase III subunit A                          | Literature           | ENSG00000148606 |
| 177 | HPRR1450429 | POLR3K  | Q9Y2Y1 | RNA polymerase III subunit K                          | Literature           | ENSG00000161980 |
| 178 | HPRR3700267 | PRKCG   | P05129 | protein kinase C gamma                                | Literature           | ENSG00000126583 |
| 179 | HPRR2770085 | PTGER1  | P34995 | prostaglandin E receptor 1                            | Literature           | ENSG00000160951 |
| 180 | HPRR2710019 | PTGIR   | P43119 | prostaglandin I2 receptor                             | Literature           | ENSG00000160013 |
| 181 | HPRR490039  | PTK2    | Q05397 | protein tyrosine kinase 2                             | Literature           | ENSG00000169398 |
| 182 | HPRR3770043 | PTPRS   | Q13332 | protein tyrosine phosphatase receptor type S          | Untargeted screening | ENSG00000105426 |
| 183 | HPRR2360025 | RASAL2  | Q9UJF2 | RAS protein activator like 2                          | Untargeted screening | ENSG00000075391 |
| 184 | HPRR2360023 | RASAL2  | Q9UJF2 | RAS protein activator like 2                          | Untargeted screening | ENSG00000075391 |
| 185 | HPRR4050163 | RNPC3   | Q96LT9 | RNA binding region (RNP1, RRM) containing 3           | Literature           | ENSG00000185946 |
| 186 | HPRR490004  | ROCK1   | Q13464 | Rho associated coiled-coil                            | Literature           | ENSG00000067900 |

## Supplementary Material

|            |             |           |        |                                                        |                      |                 |
|------------|-------------|-----------|--------|--------------------------------------------------------|----------------------|-----------------|
|            |             |           |        | containing protein kinase 1                            |                      |                 |
| <b>187</b> | HPRR3390156 | ROCK1     | Q13464 | Rho associated coiled-coil containing protein kinase 1 | Literature           | ENSG00000067900 |
| <b>188</b> | HPRR1840080 | ROCK2     | O75116 | Rho associated coiled-coil containing protein kinase 2 | Literature           | ENSG00000134318 |
| <b>189</b> | HPRR1840079 | ROCK2     | O75116 | Rho associated coiled-coil containing protein kinase 2 | Literature           | ENSG00000134318 |
| <b>190</b> | HPRR2850065 | SAMD15    | Q9P1V8 | sterile alpha motif domain containing 15               | Untargeted screening | ENSG00000100583 |
| <b>191</b> | HPRR2551271 | SASS6     | Q6UVJ0 | SAS-6 centriolar assembly protein                      | Untargeted screening | ENSG00000156876 |
| <b>192</b> | HPRR3250185 | SCAF1     | Q9H7N4 | SR-related CTD associated factor 1                     | Untargeted screening | ENSG00000126461 |
| <b>193</b> | HPRR2550019 | SELE      | P16581 | selectin E                                             | Literature           | ENSG00000007908 |
| <b>194</b> | HPRR2550021 | SELE      | P16581 | selectin E                                             | Literature           | ENSG00000007908 |
| <b>195</b> | HPRR3420665 | SELL      | P14151 | selectin L                                             | Untargeted screening | ENSG00000188404 |
| <b>196</b> | HPRR3420664 | SELL      | P14151 | selectin L                                             | Untargeted screening | ENSG00000188404 |
| <b>197</b> | HPRR3790545 | SERPINB13 | Q9UIV8 | serpin family B member 13                              | Untargeted screening | ENSG00000197641 |

|     |             |           |        |                                               |                      |                 |
|-----|-------------|-----------|--------|-----------------------------------------------|----------------------|-----------------|
| 198 | HPRR3790544 | SERPINB13 | Q9UIV8 | serpin family B member 13                     | Untargeted screening | ENSG00000197641 |
| 199 | HPRR3020262 | SFTPD     | P35247 | surfactant protein D                          | Literature           | ENSG00000133661 |
| 200 | HPRR3890703 | SFTPD     | P35247 | surfactant protein D                          | Literature           | ENSG00000133661 |
| 201 | HPRR3140530 | SGPP1     | Q9BX95 | sphingosine-1-phosphate phosphatase 1         | Literature           | ENSG00000126821 |
| 202 | HPRR3141067 | SHH       | Q15465 | sonic hedgehog signaling molecule             | Literature           | ENSG00000164690 |
| 203 | HPRR3870113 | SLC17A6   | Q9P2U8 | solute carrier family 17 member 6             | Untargeted screening | ENSG00000091664 |
| 204 | HPRR3760231 | SLC24A4   | Q8NFF2 | solute carrier family 24 member 4             | Untargeted screening | ENSG00000140090 |
| 205 | HPRR3430060 | SMAD1     | Q15797 | SMAD family member 1                          | Literature           | ENSG00000170365 |
| 206 | HPRR4080072 | SMAD2     | Q15796 | SMAD family member 2                          | Literature           | ENSG00000175387 |
| 207 | HPRR3340151 | SMAD3     | P84022 | SMAD family member 3                          | Literature           | ENSG00000166949 |
| 208 | HPRR630026  | SMAD4     | Q13485 | SMAD family member 4                          | Literature           | ENSG00000141646 |
| 209 | HPRR640097  | SMAD7     | O15105 | SMAD family member 7                          | Literature           | ENSG00000101665 |
| 210 | HPRR3210218 | SNRNP70   | P08621 | small nuclear ribonucleoprotein U1 subunit 70 | Literature           | ENSG00000104852 |
| 211 | HPRR3310244 | SPTLC3    | Q9NUV7 | serine palmitoyltransferase                   | Untargeted screening | ENSG00000172296 |

## Supplementary Material

|     |             |        |        |                                                        |                      |                 |
|-----|-------------|--------|--------|--------------------------------------------------------|----------------------|-----------------|
|     |             |        |        | long chain base subunit 3                              |                      |                 |
| 212 | HPRR2970130 | SRC    | P12931 | SRC proto-oncogene, non-receptor tyrosine kinase       | Literature           | ENSG00000197122 |
| 213 | HPRR260287  | STAT4  | Q14765 | signal transducer and activator of transcription 4     | Literature           | ENSG00000138378 |
| 214 | HPRR1450666 | SUPT3H | O75486 | SPT3 homolog, SAGA and STAGA complex component         | Untargeted screening | ENSG00000196284 |
| 215 | HPRR2800078 | TAB1   | Q15750 | TGF-beta activated kinase 1 (MAP3K7) binding protein 1 | Literature           | ENSG00000100324 |
| 216 | HPRR4080105 | TEAD1  | P28347 | TEA domain transcription factor 1                      | Literature           | ENSG00000187079 |
| 217 | HPRR3700118 | TGFB1  |        | transforming growth factor beta 1                      | Literature           | ENSG00000105329 |
| 218 | HPRR2110073 | TGFB1  | P36897 | transforming growth factor beta receptor 1             | Literature           | ENSG00000106799 |
| 219 | HPRR2430030 | TGM2   | P21980 | transglutaminase 2                                     | Literature           | ENSG00000198959 |
| 220 | HPRR350066  | THBS1  | P07996 | thrombospondin 1                                       | Literature           | ENSG00000137801 |
| 221 | HPRR4190052 | THBS1  | P07996 | thrombospondin 1                                       | Literature           | ENSG00000137801 |
| 222 | HPRR3250232 | TICAM1 | Q8IUC6 | toll like receptor adaptor molecule 1                  | Literature           | ENSG00000127666 |
| 223 | HPRR3700361 | TLR4   | O00206 | toll like receptor 4                                   | Literature           | ENSG00000136869 |

|     |             |             |        |                                      |                      |                 |
|-----|-------------|-------------|--------|--------------------------------------|----------------------|-----------------|
| 224 | HPRR670038  | TNC         | P24821 | tenascin C                           | Literature           | ENSG00000041982 |
| 225 | HPRR2420092 | TOP1        | P11387 | DNA topoisomerase I                  | Literature           | ENSG00000198900 |
| 226 | HPRR3340413 | TRIM10      | Q9UDY6 | tripartite motif containing 10       | Untargeted screening | ENSG00000204613 |
| 227 | HPRR3340414 | TRIM10      | Q9UDY6 | tripartite motif containing 10       | Untargeted screening | ENSG00000204613 |
| 228 | HPRR1060031 | TRIM21      | P19474 | tripartite motif containing 21       | Literature           | ENSG00000132109 |
| 229 | HPRR400060  | RO60/TROVE2 | P10155 | Ro60, Y RNA binding protein          | Literature           | ENSG00000116747 |
| 230 | HPRR1440120 | USP30       | Q70CQ3 | ubiquitin specific peptidase 30      | Untargeted screening | ENSG00000135093 |
| 231 | HPRR2760266 | VCAM1       | P19320 | vascular cell adhesion molecule 1    | Literature           | ENSG00000162692 |
| 232 | HPRR2760265 | VCAM1       | P19320 | vascular cell adhesion molecule 1    | Literature           | ENSG00000162692 |
| 233 | HPRR3730128 | VEGFA       | P15692 | vascular endothelial growth factor A | Literature           | ENSG00000112715 |
| 234 | HPRR4040205 | VEGFB       | P49765 | vascular endothelial growth factor B | Literature           | ENSG00000173511 |
| 235 | HPRR3760438 | VEGFC       | P49767 | vascular endothelial growth factor C | Literature           | ENSG00000150630 |
| 236 | HPRR230623  | VEGFD       | O43915 | vascular endothelial growth factor D | Literature           | ENSG00000165197 |
| 237 | HPRR4160898 | VSX1        | Q9NZR4 | visual system homeobox 1             | Untargeted screening | ENSG00000100987 |

## Supplementary Material

|            |             |            |        |                                                                                       |                      |                 |
|------------|-------------|------------|--------|---------------------------------------------------------------------------------------|----------------------|-----------------|
| <b>238</b> | HPRR330185  | VWF        | P04275 | von Willebrand factor                                                                 | Literature           | ENSG00000110799 |
| <b>239</b> | HPRR330186  | VWF        | P04275 | von Willebrand factor                                                                 | Literature           | ENSG00000110799 |
| <b>240</b> | HPRR370161  | WIF1       | Q9Y5W5 | WNT inhibitory factor 1                                                               | Literature           | ENSG00000156076 |
| <b>241</b> | HPRR2300013 | CCN6/WISP3 | O95389 | cellular communication network factor 6 OR WNT1 Inducible Signaling Pathway Protein 3 | Untargeted screening | ENSG00000112761 |
| <b>242</b> | HPRR2300016 | CCN6/WISP3 | O95389 | cellular communication network factor 6 OR WNT1 Inducible Signaling Pathway Protein 3 | Untargeted screening | ENSG00000112761 |
| <b>243</b> | HPRR2510003 | WIZ        | O95785 | WIZ zinc finger                                                                       | Untargeted screening | ENSG00000011451 |
| <b>244</b> | HPRR1450035 | WWTR1      | Q9GZV5 | WW domain containing transcription regulator 1                                        | Literature           | ENSG00000018408 |
| <b>245</b> | HPRR3050310 | YAP1       | P46937 | Yes1 associated transcriptional regulator                                             | Literature           | ENSG00000137693 |
| <b>246</b> | HPRR4030212 | ZNF202     | O95125 | zinc finger protein 202                                                               | Untargeted screening | ENSG00000166261 |

Supplementary Table S3. Performance of the 11 autoantibodies in classifying SSc patients and controls at different cutoffs.

| SSc patients (N=55)            |             |             | Controls (N=52)      |             |             |                      |
|--------------------------------|-------------|-------------|----------------------|-------------|-------------|----------------------|
| Cutoff                         | Positive    | Negative    | True                 | Positive    | Negative    | False                |
| [N of detected autoantibodies] | results [N] | results [N] | positive results [%] | results [N] | results [N] | positive results [%] |
| ≥3                             | 14          | 41          | 25                   | 0           | 52          | 0                    |
| ≥2                             | 29          | 26          | 53                   | 5           | 47          | 10                   |
| ≥1                             | 47          | 8           | 85                   | 24          | 28          | 46                   |
